# Supplementary material
Source: PubMed Central journal article supplement (PMC3606672)
Supplement: NIHMS437525-supplement-Table_1S.pdf [file NIHMS437525-supplement-Table_1S.pdf]

**Table-1S Characteristics of human subjects**Middle age group ( $41 \pm 1$  yr)Old age group ( $70 \pm 3$  yr)

| Group   | Age, (yr) | Sex | Cause of death         | Group   | Age, (yr) | Sex | Cause of death              |
|---------|-----------|-----|------------------------|---------|-----------|-----|-----------------------------|
| Control | 32        | F   | Cardiopulmonary attack | Control | 60        | F   | Cardiopulmonary attack      |
| Control | 46        | M   | Cardiopulmonary attack | Control | 71        | M   | Cardiopulmonary attack      |
| Control | 54        | M   | Cardiopulmonary attack | Control | 80        | M   | Myocardial infraction       |
| Control | 36        | M   | Electrocution          | Control | 79        | F   | Cardiopulmonary attack      |
| Control | 41        | M   | Cardiopulmonary attack | Control | 72        | M   | Cardiopulmonary attack      |
| Control | 49        | M   | Cardiopulmonary attack | Control | 64        | M   | Acute myocardial infraction |
| Control | 35        | M   | Cardiac arrest         | Control | 74        | M   | Cardiac arrest              |
| Control | 35        | M   | unknown                | Control | 61        | M   | Myocardial infraction       |
| Control | 45        | M   | unknown                | Control | 78        | F   | Myocardial infraction       |
|         |           |     |                        | Control | 63        | M   | Heart failure               |
